# Supplementary material for: A Clinical Update and Radiologic Review of Pediatric Orbital and Ocular Tumors
Source: PubMed Central journal article supplement (PMC3610355; doi:10.1155/2013/975908), 2013-03-12
Supplement: 975908.f1.pdf [file 975908.f1.pdf]

**Supplemental Table 1****International Classification for Intraocular Retinoblastoma**

| <b>Group</b> | <b>Simple Reference</b>                                     | <b>Specifications</b>                                                                                                                                                                                                                                                                                                                                                                            |
|--------------|-------------------------------------------------------------|--------------------------------------------------------------------------------------------------------------------------------------------------------------------------------------------------------------------------------------------------------------------------------------------------------------------------------------------------------------------------------------------------|
| <b>A</b>     | Small tumor                                                 | Lesion $\leq$ 3 mm                                                                                                                                                                                                                                                                                                                                                                               |
| <b>B</b>     | Large tumor<br>Macula<br>Juxtapapillary<br>Subretinal fluid | Lesion > 3 mm or<br>- Macular Rb location $\leq$ 3 mm to foveola<br>- Juxtapapillary Rb location $\leq$ 1.5 mm to disc<br>- Subretinal fluid $\leq$ 3 mm from margin                                                                                                                                                                                                                             |
| <b>C</b>     | Focal seeds                                                 | Lesion with<br>- Subretinal seeds $\leq$ 3 mm from lesion<br>- Vitreous seeds $\leq$ 3 mm from lesion<br>- Subretinal and vitreous seeds $\leq$ 3 mm from lesion                                                                                                                                                                                                                                 |
| <b>D</b>     | Diffuse seeds                                               | Lesion with<br>- Subretinal seeds > 3 mm<br>- Vitreous seeds > 3 mm<br>- Both subretinal and vitreous seeds > 3 mm                                                                                                                                                                                                                                                                               |
| <b>E</b>     | Extensive retinoblastoma                                    | Large tumor burden with anatomic or functional destruction of the eye and/or:<br>- Neovascular glaucoma<br>- Opaque media from anterior chamber, vitreous, or subretinal hemorrhage<br>- Post-laminar optic nerve invasion, > 2 mm of choroidal invasion, scleral, orbital, or anterior chamber involvement<br>- Lens- tumor touch<br>- Diffuse infiltrating tumor<br>- Phthisis or pre-phthisis |

**Legend**

**Table 1.** The International Intraocular Retinoblastoma Classification system divides intraocular retinoblastomas into 5 groups (A through E), based on the chance that the eye can be salvaged using current treatments.
